# Supplementary material for: Lactoferrin/Calcium Phosphate-Modified Porous Ti by Biomimetic Mineralization: Effective Infection Prevention and Excellent Osteoinduction
Source: Materials (Basel). 2021 Feb 19;14(4):992. doi: 10.3390/ma14040992 (PMC7923298; doi:10.3390/ma14040992)
Supplement: Supplementary file 1 [file materials-14-00992-s001.zip › materials-1072849-supplementary.pdf]

Supplementary Materials

# Lactoferrin/Calcium Phosphate-Modified Porous Ti by Biomimetic Mineralization: Effective Infection Prevention and Excellent Osteoinduction

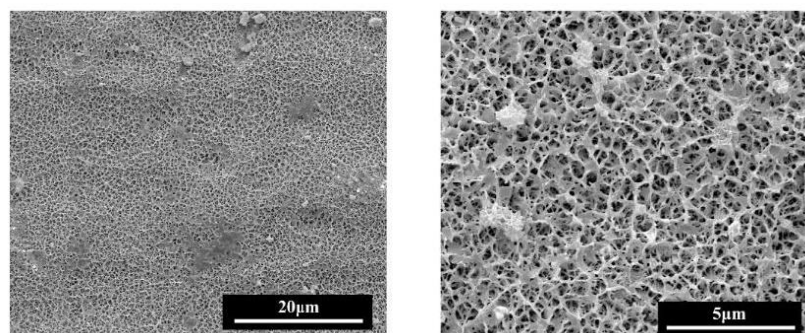

**Figure S1.** SEM images of lactoferrin-middle (LF-M) dried by vacuum oven at 37 °C.

**Table S1.** Cumulative concentration of lactoferrin at 1 month.

| Group         | LF-L  | LF-M   | LF-H   |
|---------------|-------|--------|--------|
| Concentration | 24.81 | 133.29 | 521.03 |
| ±SD (μg/mL)   | ±2.73 | ±3.53  | ±8.83  |

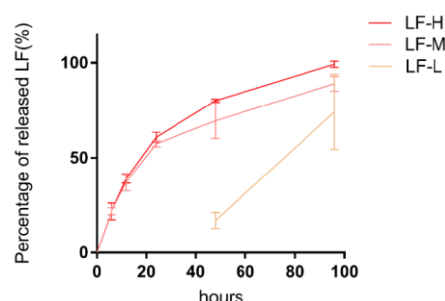

**Figure S2.** Release kinetics of LF on Ti specimens (LF-L, LF-M and LF-H) in PBS in percentage.

**Table S2.** Ca ions released from the coatings detected by inductively coupled plasma-mass spec-trometry (ICP-MS).

| Group | Element | Time (h) | Concentration (mg/L) | Concentration ratio (24 h/96 h) |
|-------|---------|----------|----------------------|---------------------------------|
| CaP   | Ca      | 24       | 26.2                 | 67.0%                           |
|       |         | 96       | 39.1                 |                                 |
| LF-L  | Ca      | 24       | 27.3                 | 73.4%                           |
|       |         | 96       | 37.2                 |                                 |
| LF-M  | Ca      | 24       | 25.7                 | 69.6%                           |
|       |         | 96       | 36.9                 |                                 |
| LF-H  | Ca      | 24       | 33.3                 | 84.1%                           |
|       |         | 96       | 39.5                 |                                 |
